# Supplementary material
Source: PubMed Central journal article supplement (PMC2841898)
Supplement: 0914089107_st01.pdf [file 0914089107_st01.pdf]

## Table S1. Habitat categories.

Percent coverage and distribution of habitat types among 5 km × 5 km cells in Denmark.

| Habitat Categories                 | % cover in cells | % cells with > 25 ha of habitat |
|------------------------------------|------------------|---------------------------------|
| open saline water                  | 20.3             | 40.7                            |
| open fresh water                   | 0.8              | 10.3                            |
| urban and unvegetated ground       | 7.7              | 93.8                            |
| Seasonally tilled cropland         | 38.0             | 95.8                            |
| grazed or mown grassland           | 19.0             | 97.0                            |
| marshland and bog                  | 0.8              | 21.1                            |
| grassy heathland                   | 2.6              | 67.5                            |
| mixed grassy and shrubby heathland | 0.5              | 12.6                            |
| shrubby heathland                  | 0.8              | 21.2                            |
| shrubby woodland                   | 1.6              | 49.5                            |
| deciduous woodland                 | 3.6              | 69.6                            |
| coniferous woodland                | 4.3              | 60.6                            |
