# Supplementary material
Source: PubMed Central journal article supplement (PMC2841898)
Supplement: 0914089107_st02.pdf [file 0914089107_st02.pdf]

## Table S2. Macroecological traits of the Danish avifauna.

Rows represent breeding species included in the analysis. 25 km<sup>2</sup> = number of grid-cell occurrences at the 5 x 5 km<sup>2</sup> spatial grain (n = 2003 grid cells total; 100km<sup>2</sup> = number of grid cell occurrences at the 10 x 10 km<sup>2</sup> spatial grain (n = 620 grid cells total). Territoriality = territorial or colonial status. Body mass = adult body mass in grams (averages given for sexually dimorphic species). N = estimated number of breeding pairs in Denmark. Foraging guild and congeneric guild assignments were made *a priori* by C. Rahbek and J. Fjeldså.

| Common English Name | Scientific Name               | 25 km <sup>2</sup> | 100 km <sup>2</sup> | Territoriality | Body Mass | N     | Foraging Guild    | Congeneric Guild |
|---------------------|-------------------------------|--------------------|---------------------|----------------|-----------|-------|-------------------|------------------|
| Little Grebe        | <i>Tachybaptus ruficollis</i> | 646                | 387                 | territorial    | 190       | 1750  | aquatic pursuers  |                  |
| Great Crested Grebe | <i>Podiceps cristatus</i>     | 563                | 321                 | territorial    | 875       | 4000  | aquatic pursuers  |                  |
| Red-necked Grebe    | <i>Podiceps griseigena</i>    | 501                | 302                 | territorial    | 850       | 1750  | aquatic pursuers  |                  |
| Horned Grebe        | <i>Podiceps auritus</i>       | 2                  | 2                   | territorial    | 394       | <10   | aquatic pursuers  |                  |
| Eared Grebe         | <i>Podiceps nigricollis</i>   | 54                 | 41                  | territorial    | 290       | 275   | aquatic pursuers  |                  |
| Great Cormorant     | <i>Phalacrocorax carbo</i>    | 42                 | 47                  | colonial       | 2110      | 38500 | aquatic pursuers  |                  |
| Eurasian Bittern    | <i>Botaurus stellaris</i>     | 68                 | 56                  | territorial    | 1225      | 175   | wading birds      |                  |
| Gray Heron          | <i>Ardea cinerea</i>          | 226                | 199                 | colonial       | 1432.5    | 6735  | wading birds      |                  |
| Black Stork         | <i>Ciconia nigra</i>          | 1                  | 1                   | territorial    | 3000      | <10   | wading birds      |                  |
| White Stork         | <i>Ciconia ciconia</i>        | 8                  | 7                   | territorial    | 3447.5    | <10   | wading birds      |                  |
| Eurasian Spoonbill  | <i>Platalea leucorodia</i>    | 2                  | 2                   | colonial       | 1260      | <10   | wading birds      |                  |
| Mute Swan           | <i>Cygnus olor</i>            | 925                | 484                 | territorial    | 10750     | 5000  | grazing waterfowl |                  |
| Graylag Goose       | <i>Anser anser</i>            | 435                | 267                 | territorial    | 3465      | 3750  | grazing waterfowl |                  |

|                        |                             |      |     |             |        |       |                   |  |
|------------------------|-----------------------------|------|-----|-------------|--------|-------|-------------------|--|
| Canada Goose           | <i>Branta canadensis</i>    | 26   | 25  | territorial | 4635   | 38    | grazing waterfowl |  |
| Barnacle Goose         | <i>Branta leucopsis</i>     | 4    | 5   | territorial | 1585   | 17    | grazing waterfowl |  |
| Common Shelduck        | <i>Tadorna tadorna</i>      | 1131 | 533 | territorial | 1152.5 | 2500  | dabbling ducks    |  |
| Eurasian Wigeon        | <i>Anas penelope</i>        | 7    | 9   | territorial | 642.5  | 10    | grazing waterfowl |  |
| Gadwall                | <i>Anas strepera</i>        | 78   | 71  | territorial | 750    | 275   | dabbling ducks    |  |
| Green-winged Teal      | <i>Anas crecca</i>          | 177  | 147 | territorial | 355    | 300   | dabbling ducks    |  |
| Mallard                | <i>Anas platyrhynchos</i>   | 1747 | 603 | territorial | 1030   | 20000 | dabbling ducks    |  |
| Northern Pintail       | <i>Anas acuta</i>           | 45   | 46  | territorial | 807.5  | 163   | dabbling ducks    |  |
| Garganey               | <i>Anas querquedula</i>     | 97   | 86  | territorial | 327.5  | 275   | dabbling ducks    |  |
| Northern Shoveler      | <i>Anas clypeata</i>        | 221  | 182 | territorial | 652.5  | 900   | dabbling ducks    |  |
| Common Pochard         | <i>Aythya ferina</i>        | 214  | 159 | territorial | 870    | 500   | diving ducks      |  |
| Tufted Duck            | <i>Aythya fuligula</i>      | 358  | 249 | territorial | 657.5  | 900   | diving ducks      |  |
| Common Eider           | <i>Somateria mollissima</i> | 110  | 119 | territorial | 2067.5 | 22000 | diving ducks      |  |
| Common Goldeneye       | <i>Bucephala clangula</i>   | 20   | 14  | territorial | 825    | 63    | diving ducks      |  |
| Red-breasted Merganser | <i>Mergus serrator</i>      | 276  | 200 | territorial | 1092.5 | 2500  | aquatic pursuers  |  |
| Common Merganser       | <i>Mergus merganser</i>     | 35   | 24  | territorial | 1435   | 50    | aquatic pursuers  |  |
| Honey Buzzard          | <i>Pernis apivorus</i>      | 268  | 169 | territorial | 625    | 650   | diurnal raptors   |  |
| Red Kite               | <i>Milvus milvus</i>        | 39   | 32  | territorial | 1015   | 26    | diurnal raptors   |  |
| White-tailed Eagle     | <i>Haliaeetus albicilla</i> | 3    | 3   | territorial | 4792.5 | <10   | diurnal raptors   |  |
| Marsh Harrier          | <i>Circus aeruginosus</i>   | 391  | 250 | territorial | 585    | 650   | diurnal raptors   |  |
| Northern Harrier       | <i>Circus cyaneus</i>       | 7    | 7   | territorial | 438.5  | <10   | diurnal raptors   |  |
| Montagu's Harrier      | <i>Circus pygargus</i>      | 33   | 23  | territorial | 315    | 43    | diurnal raptors   |  |
| Northern Goshawk       | <i>Accipiter gentilis</i>   | 594  | 331 | territorial | 925    | 675   | diurnal raptors   |  |
| Eurasian Sparrowhawk   | <i>Accipiter nisus</i>      | 1140 | 507 | territorial | 205    | 3750  | diurnal raptors   |  |
| Common Buzzard         | <i>Buteo buteo</i>          | 1498 | 524 | territorial | 805    | 5000  | diurnal raptors   |  |
| Osprey                 | <i>Pandion haliaetus</i>    | 10   | 10  | territorial | 1530   | <10   | diurnal raptors   |  |
| Eurasian Kestrel       | <i>Falco tinnunculus</i>    | 1215 | 529 | territorial | 115    | 2050  | diurnal raptors   |  |
| Eurasian Hobby         | <i>Falco subbuteo</i>       | 3    | 3   | territorial | 210    | <10   | diurnal raptors   |  |

|                        |                                |      |     |             |       |        |                    |  |
|------------------------|--------------------------------|------|-----|-------------|-------|--------|--------------------|--|
| Black Grouse           | <i>Tetrao tetrix</i>           | 1    | 1   | territorial | 1080  | <10    | gallinaceous birds |  |
| Gray Partridge         | <i>Perdix perdix</i>           | 1464 | 547 | territorial | 385   | 25000  | gallinaceous birds |  |
| Common Quail           | <i>Coturnix coturnix</i>       | 113  | 91  | territorial | 100   | 38     | gallinaceous birds |  |
| Ring-necked Pheasant   | <i>Phasianus colchicus</i>     | 1790 | 590 | territorial | 1125  | 280000 | gallinaceous birds |  |
| Water Rail             | <i>Rallus aquaticus</i>        | 400  | 282 | territorial | 115.5 | 3500   | Rails              |  |
| Spotted Crake          | <i>Porzana porzana</i>         | 24   | 21  | territorial | 83    | 35     | Rails              |  |
| Comcrake               | <i>Crex crex</i>               | 12   | 12  | territorial | 155   | <10    | Rails              |  |
| Common Moorhen         | <i>Gallinula chloropus</i>     | 1329 | 550 | territorial | 350   | 50000  | Rails              |  |
| Eurasian Coot          | <i>Fulica atra</i>             | 1604 | 588 | territorial | 775   | 20000  | Rails              |  |
| Common Crane           | <i>Grus grus</i>               | 9    | 8   | territorial | 5275  | 10     | wading birds       |  |
| Eurasian Oystercatcher | <i>Haematopus ostralegus</i>   | 758  | 420 | territorial | 525   | 7500   | plovers            |  |
| Black-winged Stilt     | <i>Himantopus himantopus</i>   | 1    | 1   | territorial | 205   | <10    | plovers            |  |
| Pied Avocet            | <i>Recurvirostra avosetta</i>  | 182  | 141 | territorial | 245   | 5000   | plovers            |  |
| Little Ringed Plover   | <i>Charadrius dubius</i>       | 227  | 173 | territorial | 38.5  | 300    | plovers            |  |
| Common Ringed Plover   | <i>Charadrius hiaticula</i>    | 485  | 317 | territorial | 64.5  | 2000   | plovers            |  |
| Snowy Plover           | <i>Charadrius alexandrinus</i> | 11   | 10  | territorial | 47.5  | 55     | plovers            |  |
| European Golden Plover | <i>Pluvialis apricaria</i>     | 5    | 5   | territorial | 175   | <10    | plovers            |  |
| Northern Lapwing       | <i>Vanellus vanellus</i>       | 1805 | 597 | territorial | 217.5 | 40000  | plovers            |  |
| Dunlin                 | <i>Calidris alpina</i>         | 69   | 64  | territorial | 47    | 450    | scolopacids        |  |
| Ruff                   | <i>Philomachus pugnax</i>      | 41   | 34  | territorial | 140   | 400    | scolopacids        |  |
| Common Snipe           | <i>Gallinago gallinago</i>     | 662  | 385 | territorial | 105   | 2750   | scolopacids        |  |
| Eurasian Woodcock      | <i>Scolopax rusticola</i>      | 321  | 207 | territorial | 295   | 1750   | scolopacids        |  |
| Black-tailed Godwit    | <i>Limosa limosa</i>           | 49   | 38  | territorial | 332.5 | 700    | scolopacids        |  |
| Whimbrel               | <i>Numenius arquata</i>        | 115  | 82  | territorial | 987.5 | 300    | scolopacids        |  |
| Common Redshank        | <i>Tringa totanus</i>          | 583  | 338 | territorial | 121.5 | 12500  | scolopacids        |  |
| Green Sandpiper        | <i>Tringa ochropus</i>         | 34   | 28  | territorial | 80.5  | 55     | scolopacids        |  |
| Wood Sandpiper         | <i>Tringa glareola</i>         | 25   | 19  | territorial | 67.5  | 73     | scolopacids        |  |
| Common Sandpiper       | <i>Actitis hypoleucos</i>      | 4    | 4   | territorial | 48    | <10    | scolopacids        |  |

|                          |                              |      |     |             |       |        |             |  |
|--------------------------|------------------------------|------|-----|-------------|-------|--------|-------------|--|
| Ruddy Turnstone          | <i>Arenaria interpres</i>    | 1    | 7   | territorial | 110.5 | 40     | scolopacids |  |
| Mediterranean Gull       | <i>Larus melanocephalus</i>  | 1    | 1   | colonial    | 275   | <10    | Gulls       |  |
| Black-headed Gull        | <i>Larus ridibundus</i>      | 386  | 276 | colonial    | 280   | 150000 | Gulls       |  |
| Common Gull              | <i>Larus canus</i>           | 240  | 193 | colonial    | 387.5 | 27500  | Gulls       |  |
| Lesser Black-backed Gull | <i>Larus fuscus</i>          | 26   | 41  | colonial    | 715   | 4400   | Gulls       |  |
| Herring Gull             | <i>Larus argentatus</i>      | 171  | 160 | colonial    | 957.5 | 56500  | Gulls       |  |
| Great Black-backed Gull  | <i>Larus marinus</i>         | 75   | 86  | territorial | 1600  | 1550   | Gulls       |  |
| Black-legged Kittiwake   | <i>Rissa tridactyla</i>      | 3    | 0   | colonial    | 307.5 | 625    | Gulls       |  |
| Gull-billed Tern         | <i>Gelochelidon nilotica</i> | 5    | 5   | colonial    | 217.5 | 14     | Terns       |  |
| Sandwich Tern            | <i>Sterna sandvicensis</i>   | 18   | 26  | colonial    | 275   | 4500   | Terns       |  |
| Common Tern              | <i>Sterna hirundo</i>        | 92   | 86  | colonial    | 125   | 1000   | Terns       |  |
| Arctic Tern              | <i>Sterna paradisaea</i>     | 157  | 142 | colonial    | 109.5 | 8500   | Terns       |  |
| Little Tern              | <i>Sterna albifrons</i>      | 61   | 65  | colonial    | 57    | 500    | Terns       |  |
| Black Tern               | <i>Chlidonis niger</i>       | 13   | 11  | colonial    | 63    | 100    | Terns       |  |
| Razorbill                | <i>Alca torda</i>            | 1    | 0   | colonial    | 722.5 | 610    |             |  |
| Black Guillemot          | <i>Cephus grylle</i>         | 6    | 17  | colonial    | 377.5 | 1089   |             |  |
| Stock Dove               | <i>Columba oenas</i>         | 255  | 178 | territorial | 302.5 | 900    | columbids   |  |
| Common Wood Pigeon       | <i>Columba palumbus</i>      | 1939 | 608 | territorial | 510   | 291000 | columbids   |  |
| Eurasian Collared Dove   | <i>Streptopelia decaocto</i> | 1482 | 563 | territorial | 195   | 48500  | columbids   |  |
| European Turtle Dove     | <i>Streptopelia turtur</i>   | 32   | 19  | territorial | 153.5 | 118    | columbids   |  |
| Common Cuckoo            | <i>Cuculus canorus</i>       | 1755 | 594 | territorial | 110   | 22050  |             |  |
| Barn Owl                 | <i>Tyto alba</i>             | 38   | 32  | territorial | 365   | 63     | Owls        |  |
| Eurasian Eagle Owl       | <i>Bubo bubo</i>             | 28   | 24  | territorial | 2220  | 33     | Owls        |  |
| Little Owl               | <i>Athene noctua</i>         | 110  | 79  | territorial | 167.5 | 188    | Owls        |  |
| Tawny Owl                | <i>Strix aluco</i>           | 889  | 395 | territorial | 462.5 | 4500   | Owls        |  |
| Long-eared Owl           | <i>Asio otus</i>             | 644  | 381 | territorial | 257.5 | 1750   | Owls        |  |
| Short-eared Owl          | <i>Asio flammeus</i>         | 14   | 15  | territorial | 295   | <10    | Owls        |  |
| European Nightjar        | <i>Caprimulgus europaeus</i> | 114  | 77  | territorial | 85    | 550    |             |  |

|                           |                                |      |     |             |       |         |                                         |               |
|---------------------------|--------------------------------|------|-----|-------------|-------|---------|-----------------------------------------|---------------|
| Common Swift              | <i>Apus apus</i>               | 599  | 337 | territorial | 39.5  | 100000  | aerial insectivores                     |               |
| Common Kingfisher         | <i>Alcedo atthis</i>           | 160  | 111 | territorial | 39    | 300     |                                         |               |
| Eurasian Hoopoe           | <i>Upupa epops</i>             | 1    | 1   | territorial | 66.5  | <10     |                                         |               |
| Eurasian Wryneck          | <i>Jynx torquilla</i>          | 99   | 81  | territorial | 37.5  | 88      | woodpeckers                             |               |
| European Green Woodpecker | <i>Picus viridis</i>           | 451  | 218 | territorial | 191   | 775     | woodpeckers                             |               |
| Black Woodpecker          | <i>Dryocopus martius</i>       | 149  | 96  | territorial | 275   | 225     | woodpeckers                             |               |
| Great Spotted Woodpecker  | <i>Dendrocopos major</i>       | 1518 | 552 | territorial | 74    | 100000  | woodpeckers                             |               |
| Lesser Spotted Woodpecker | <i>Dendrocopos minor</i>       | 37   | 31  | territorial | 20    | 85      | woodpeckers                             |               |
| Crested Lark              | <i>Galerida cristata</i>       | 38   | 33  | territorial | 44.65 | 63      | open-land insectivores                  |               |
| Wood Lark                 | <i>Lullula arborea</i>         | 145  | 95  | territorial | 30    | 300     | open-land insectivores                  |               |
| Eurasian Skylark          | <i>Alauda arvensis</i>         | 1984 | 614 | territorial | 36.4  | 1360000 | open-land insectivores                  |               |
| Sand Martin               | <i>Riparia riparia</i>         | 693  | 418 | territorial | 13.15 | 30000   | aerial insectivores                     |               |
| Barn Swallow              | <i>Hirundo rustica</i>         | 1920 | 608 | territorial | 19.05 | 385000  | aerial insectivores                     |               |
| Common House Martin       | <i>Delichon urbica</i>         | 1629 | 585 | territorial | 18.6  | 93500   | aerial insectivores                     |               |
| Tawny Pipit               | <i>Anthus campestris</i>       | 6    | 6   | territorial | 24.5  | 23      | open-land insectivores                  | <i>Anthus</i> |
| Tree Pipit                | <i>Anthus trivialis</i>        | 1275 | 494 | territorial | 21.5  | 67000   | open-land insectivores                  | <i>Anthus</i> |
| Meadow Pipit              | <i>Anthus pratensis</i>        | 1130 | 546 | territorial | 19.25 | 40000   | open-land insectivores                  | <i>Anthus</i> |
| Water Pipit               | <i>Anthus spinoletta</i>       | 12   | 18  | territorial | 23.5  | 123     | open-land insectivores                  | <i>Anthus</i> |
| Yellow Wagtail            | <i>Motacilla flava</i>         | 350  | 236 | territorial | 17    | 8900    | open-land insectivores                  |               |
| Gray Wagtail              | <i>Motacilla cinerea</i>       | 326  | 179 | territorial | 17.4  | 475     |                                         |               |
| White Wagtail             | <i>Motacilla alba</i>          | 1893 | 611 | territorial | 20.8  | 111000  | open-land insectivores                  |               |
| White-throated Dipper     | <i>Cinclus cinclus</i>         | 11   | 10  | territorial | 63.8  | <10     |                                         |               |
| Winter Wren               | <i>Troglodytes troglodytes</i> | 1915 | 604 | territorial | 8.9   | 404000  | terrestrial and low flycatching feeders |               |
| Dunnock                   | <i>Prunella modularis</i>      | 1728 | 596 | territorial | 19    | 101000  | terrestrial and low flycatching feeders |               |
| European Robin            | <i>Erithacus rubecula</i>      | 1807 | 594 | territorial | 16.7  | 285000  | terrestrial and low flycatching feeders |               |
| Thrush Nightingale        | <i>Luscinia luscinia</i>       | 1084 | 448 | territorial | 25    | 68000   | terrestrial and low flycatching feeders |               |
| Common Nightingale        | <i>Luscinia svecica</i>        | 4    | 2   | territorial | 20.3  | <10     | terrestrial and low flycatching feeders |               |

|                       |                                   |      |     |             |       |         |                                         |                     |
|-----------------------|-----------------------------------|------|-----|-------------|-------|---------|-----------------------------------------|---------------------|
| Black Redstart        | <i>Phoenicurus ochruros</i>       | 454  | 294 | territorial | 16.2  | 875     | terrestrial and low flycatching feeders |                     |
| Common Redstart       | <i>Phoenicurus phoenicurus</i>    | 1146 | 504 | territorial | 15.5  | 36000   | terrestrial and low flycatching feeders |                     |
| Whinchat              | <i>Saxicola rubetra</i>           | 895  | 431 | territorial | 16.5  | 14000   | terrestrial and low flycatching feeders |                     |
| Eurasian Stonechat    | <i>Saxicola torquata</i>          | 15   | 13  | territorial | 15.2  | <10     | terrestrial and low flycatching feeders |                     |
| Northern Wheatear     | <i>Oenanthe oenanthe</i>          | 253  | 198 | territorial | 23.8  | 2900    | terrestrial and low flycatching feeders |                     |
| Common Blackbird      | <i>Turdus merula</i>              | 1977 | 610 | territorial | 96    | 2282000 | thrushes                                | <i>Turdus</i>       |
| Fieldfare             | <i>Turdus pilaris</i>             | 352  | 220 | territorial | 104.5 | 3500    | thrushes                                | <i>Turdus</i>       |
| Song Thrush           | <i>Turdus philomelos</i>          | 1821 | 595 | territorial | 68.5  | 259000  | thrushes                                | <i>Turdus</i>       |
| Redwing               | <i>Turdus iliacus</i>             | 2    | 2   | territorial | 62.5  | <10     | thrushes                                | <i>Turdus</i>       |
| Mistle Thrush         | <i>Turdus viscivorus</i>          | 997  | 445 | territorial | 119   | 28000   | thrushes                                | <i>Turdus</i>       |
| Grasshopper Warbler   | <i>Locustella naevia</i>          | 413  | 271 | territorial | 13.3  | 1000    | marsh warblers                          |                     |
| River Warbler         | <i>Locustella fluviatilis</i>     | 11   | 10  | territorial | 18.8  | <10     | marsh warblers                          |                     |
| Savi's Warbler        | <i>Locustella luscinioides</i>    | 22   | 19  | territorial | 15.65 | 25      | marsh warblers                          |                     |
| Sedge Warbler         | <i>Acrocephalus schoenobaenus</i> | 484  | 326 | territorial | 11.9  | 3900    | marsh warblers                          | <i>Acrocephalus</i> |
| Marsh Warbler         | <i>Acrocephalus palustris</i>     | 1198 | 514 | territorial | 12    | 30000   | marsh warblers                          | <i>Acrocephalus</i> |
| Eurasian Reed Warbler | <i>Acrocephalus scirpaceus</i>    | 1304 | 563 | territorial | 11.8  | 53000   | marsh warblers                          | <i>Acrocephalus</i> |
| Great Reed Warbler    | <i>Acrocephalus arundinaceus</i>  | 15   | 15  | territorial | 30.35 | 20      | marsh warblers                          | <i>Acrocephalus</i> |
| Icterine Warbler      | <i>Hippolais icterina</i>         | 1560 | 587 | territorial | 13.3  | 64000   | foliage gleaners                        |                     |
| Barred Warbler        | <i>Sylvia nisoria</i>             | 3    | 3   | territorial | 24.35 | <10     | foliage gleaners                        | <i>Sylvia</i>       |
| Lesser Whitethroat    | <i>Sylvia curruca</i>             | 1704 | 598 | territorial | 11.6  | 160000  | foliage gleaners                        | <i>Sylvia</i>       |
| Greater Whitethroat   | <i>Sylvia communis</i>            | 1920 | 610 | territorial | 14.5  | 358000  | foliage gleaners                        | <i>Sylvia</i>       |
| Garden Warbler        | <i>Sylvia borin</i>               | 1732 | 588 | territorial | 18.25 | 216000  | foliage gleaners                        | <i>Sylvia</i>       |
| Eurasian Blackcap     | <i>Sylvia atricapilla</i>         | 1778 | 588 | territorial | 18.95 | 284000  | foliage gleaners                        | <i>Sylvia</i>       |
| Green Warbler         | <i>Phylloscopus trochiloides</i>  | 3    | 4   | territorial | 7.8   | <10     | foliage gleaners                        | <i>Phylloscopus</i> |
| Wood Warbler          | <i>Phylloscopus sibilatrix</i>    | 629  | 372 | territorial | 10.6  | 16000   | foliage gleaners                        | <i>Phylloscopus</i> |
| Chiffchaff            | <i>Phylloscopus collybita</i>     | 1778 | 587 | territorial | 8.4   | 240000  | foliage gleaners                        | <i>Phylloscopus</i> |
| Willow Warbler        | <i>Phylloscopus trochilus</i>     | 1910 | 607 | territorial | 9.35  | 603000  | foliage gleaners                        | <i>Phylloscopus</i> |

|                          |                                |      |     |             |        |        |                    |               |
|--------------------------|--------------------------------|------|-----|-------------|--------|--------|--------------------|---------------|
| Red-breasted Flycatcher  | <i>Ficedula parva</i>          | 11   | 11  | territorial | 11     | <10    |                    |               |
| Eurasian Pied Flycatcher | <i>Ficedula hypoleuca</i>      | 646  | 372 | territorial | 13.65  | 16200  |                    |               |
| Spotted Flycatcher       | <i>Muscicapa striata</i>       | 1033 | 489 | territorial | 14.9   | 19000  |                    |               |
| Goldcrest                | <i>Regulus regulus</i>         | 1462 | 560 | territorial | 5.8    | 168000 | tit-like birds     |               |
| Firecrest                | <i>Regulus ignicapillus</i>    | 27   | 25  | territorial | 5      | 15     | tit-like birds     |               |
| Bearded Tit              | <i>Panurus biarmicus</i>       | 81   | 67  | territorial | 14.4   | 1500   |                    |               |
| Long-tailed Tit          | <i>Aegithalos caudatus</i>     | 579  | 333 | territorial | 9      | 9700   | tit-like birds     |               |
| Marsh Tit                | <i>Parus palustris</i>         | 1073 | 453 | territorial | 11.9   | 27000  | tit-like birds     | <i>Parus</i>  |
| Willow Tit               | <i>Parus montanus</i>          | 38   | 22  | territorial | 11.15  | 200    | tit-like birds     | <i>Parus</i>  |
| Crested Tit              | <i>Parus cristatus</i>         | 854  | 354 | territorial | 11.15  | 26000  | tit-like birds     | <i>Parus</i>  |
| Coal Tit                 | <i>Parus ater</i>              | 1417 | 543 | territorial | 10.1   | 178000 | tit-like birds     | <i>Parus</i>  |
| Blue Tit                 | <i>Parus caeruleus</i>         | 1839 | 597 | territorial | 10.85  | 245000 | tit-like birds     | <i>Parus</i>  |
| Great Tit                | <i>Parus major</i>             | 1943 | 607 | territorial | 18.45  | 745000 | tit-like birds     | <i>Parus</i>  |
| Eurasian Nuthatch        | <i>Sitta europaea</i>          | 948  | 409 | territorial | 23.9   | 35200  | tit-like birds     |               |
| Eurasian Treecreeper     | <i>Certhia familiaris</i>      | 863  | 403 | territorial | 9.1    | 33000  | tit-like birds     |               |
| Short-toed Treecreeper   | <i>Certhia brachydactyla</i>   | 200  | 123 | territorial | 8.6    | 1250   | tit-like birds     |               |
| Eurasian Penduline Tit   | <i>Remiz pendulinus</i>        | 87   | 71  | territorial | 10     | 150    |                    |               |
| Eurasian Golden Oriole   | <i>Oriolus oriolus</i>         | 63   | 53  | territorial | 71     | 88     |                    |               |
| Red-backed Shrike        | <i>Lanius collurio</i>         | 557  | 355 | territorial | 30.25  | 1750   |                    |               |
| Great Gray Shrike        | <i>Lanius excubitor</i>        | 18   | 15  | territorial | 67     | 23     |                    |               |
| Eurasian Jay             | <i>Garrulus glandarius</i>     | 1315 | 522 | territorial | 167.55 | 56000  | omnivorous corvids |               |
| Eurasian Magpie          | <i>Pica pica</i>               | 1656 | 556 | territorial | 217.5  | 249000 | omnivorous corvids |               |
| Spotted Nutcracker       | <i>Nucifraga caryocatactes</i> | 20   | 18  | territorial | 193    | 30     | omnivorous corvids |               |
| Western Jackdaw          | <i>Corvus monedula</i>         | 1308 | 529 | territorial | 234.5  | 82500  | omnivorous corvids | <i>Corvus</i> |
| Rook                     | <i>Corvus frugilegus</i>       | 533  | 296 | territorial | 462.5  | 45000  | omnivorous corvids | <i>Corvus</i> |
| Carrion Crow             | <i>Corvus corone</i>           | 1767 | 604 | territorial | 506    | 160000 | omnivorous corvids | <i>Corvus</i> |
| Northern Raven           | <i>Corvus corax</i>            | 461  | 255 | territorial | 1200.5 | 550    | omnivorous corvids | <i>Corvus</i> |
| Common Starling          | <i>Sturnus vulgaris</i>        | 1909 | 605 | territorial | 80.5   | 660000 |                    |               |

|                       |                                      |      |     |             |       |         |                      |                  |
|-----------------------|--------------------------------------|------|-----|-------------|-------|---------|----------------------|------------------|
| House Sparrow         | <i>Passer domesticus</i>             | 1845 | 592 | territorial | 30.35 | 944000  |                      |                  |
| Eurasian Tree Sparrow | <i>Passer montanus</i>               | 1816 | 587 | territorial | 21.7  | 482000  |                      |                  |
| Common Chaffinch      | <i>Fringilla coelebs</i>             | 1969 | 610 | territorial | 22.2  | 1700000 | foliage gleaners     |                  |
| Brambling             | <i>Fringilla montifringilla</i>      | 3    | 3   | territorial | 23.25 | <10     | foliage gleaners     |                  |
| European Serin        | <i>Serinus serinus</i>               | 18   | 18  | territorial | 11.95 | <10     | passerine seedeaters |                  |
| European Greenfinch   | <i>Carduelis chloris</i>             | 1855 | 597 | territorial | 25.1  | 489000  | passerine seedeaters | <i>Carduelis</i> |
| European Goldfinch    | <i>Carduelis carduelis</i>           | 1249 | 524 | territorial | 16.75 | 34600   | passerine seedeaters | <i>Carduelis</i> |
| Eurasian Siskin       | <i>Carduelis spinus</i>              | 314  | 227 | territorial | 13    | 1000    | passerine seedeaters | <i>Carduelis</i> |
| Common Linnet         | <i>Carduelis cannabina</i>           | 1863 | 611 | territorial | 18.75 | 283000  | passerine seedeaters | <i>Carduelis</i> |
| Common Redpoll        | <i>Carduelis flammea</i>             | 831  | 413 | territorial | 13.1  | 15000   | passerine seedeaters | <i>Carduelis</i> |
| Red Crossbill         | <i>Loxia curvirostra</i>             | 424  | 257 | territorial | 40.75 | 2000    |                      |                  |
| Parrot Crossbill      | <i>Loxia pytyopsittacus</i>          | 1    | 1   | territorial | 51.55 | <10     |                      |                  |
| Scarlet Rosefinch     | <i>Carpodacus erythrinus</i>         | 98   | 87  | territorial | 22.95 | 225     |                      |                  |
| Eurasian Bullfinch    | <i>Pyrrhula pyrrhula</i>             | 1023 | 463 | territorial | 31.05 | 45000   |                      |                  |
| Hawfinch              | <i>Coccothraustes coccothraustes</i> | 577  | 338 | territorial | 54.7  | 13900   | passerine seedeaters |                  |
| Yellowhammer          | <i>Emberiza citrinella</i>           | 1947 | 601 | territorial | 31.65 | 567000  |                      |                  |
| Reed Bunting          | <i>Emberiza schoeniclus</i>          | 1539 | 588 | territorial | 18.8  | 49900   |                      |                  |
| Corn Bunting          | <i>Miliaria calandra</i>             | 1200 | 466 | territorial | 47.65 | 31000   |                      |                  |
