# Supplementary material
Source: PubMed Central journal article supplement (PMC2841898)
Supplement: 0914089107_st03.pdf [file 0914089107_st03.pdf]

### Table S3. Null models.

Classification of row and column constraints and weighting factors used in each of 4 null model algorithms. Constraints are applied to a binary presence-absence matrix in which rows are species, columns are cells, and entries are the presence (1) or absence (0) of a particular species in a particular cell.

| Model       | Rows Sums<br>(species) | Columns Sums<br>(cells) | Weighting factor                      |
|-------------|------------------------|-------------------------|---------------------------------------|
| Fixed-fixed | Fixed                  | Fixed                   | None                                  |
| Habitat     | Fixed                  | Allowed to vary         | Habitat diversity                     |
| Population  | Allowed to vary        | Allowed to vary         | Habitat diversity and population size |
| Biomass     | Allowed to vary        | Allowed to vary         | Habitat diversity and biomass         |
