# Supplementary material
Source: PubMed Central journal article supplement (PMC2841898)
Supplement: 0914089107_st04.pdf [file 0914089107_st04.pdf]

**Table S4. Co-occurrence analyses of foraging guilds.**

Each entry represents the probability value for a one-tailed test of the null hypothesis that species co-occurrence patterns are random. Tan-shaded cells indicate statistically significant segregation. Yellow-shaded cells indicate statistically significant aggregation. No shading indicates a non-significant pattern ( $p > 0.05$  for both tails of the distribution). Number of species in each guild is given in parentheses.

| Foraging Guild                            | Fixed-Fixed Model<br>5 × 5 | Fixed-Fixed Model<br>10 × 10 | Habitat Model<br>5 × 5 | Habitat Model<br>10 × 10 | Population Model<br>5 × 5 | Population Model<br>10 × 10 | Biomass Model<br>5 × 5 | Biomass Model<br>10 × 10 |
|-------------------------------------------|----------------------------|------------------------------|------------------------|--------------------------|---------------------------|-----------------------------|------------------------|--------------------------|
| aquatic pursuers (8)                      | 0.042                      | < 0.001                      | < 0.001                | < 0.001                  | < 0.001                   | 0.006                       | < 0.001                | < 0.001                  |
| wading birds (6)                          | 0.145                      | 0.423                        | < 0.001                | < 0.001                  | < 0.001                   | < 0.001                     | < 0.001                | < 0.001                  |
| grazing waterfowl (5)                     | 0.372                      | 0.567                        | < 0.001                | < 0.001                  | 0.049                     | 0.001                       | 0.049                  | 0.003                    |
| dabbling ducks (7)                        | < 0.001                    | < 0.001                      | > 0.999                | > 0.999                  | > 0.999                   | > 0.999                     | > 0.999                | > 0.999                  |
| diving ducks (4)                          | < 0.001                    | < 0.001                      | < 0.001                | < 0.001                  | < 0.001                   | < 0.001                     | < 0.001                | < 0.001                  |
| diurnal raptors (12)                      | < 0.001                    | < 0.001                      | > 0.999                | < 0.001                  | 0.997                     | 0.164                       | > 0.999                | 0.001                    |
| gallinaceous birds (4)                    | < 0.001                    | 0.291                        | < 0.001                | < 0.001                  | < 0.001                   | < 0.001                     | < 0.001                | < 0.001                  |
| rails (5)                                 | 0.131                      | < 0.001                      | 0.933                  | < 0.001                  | 0.788                     | < 0.001                     | 0.002                  | < 0.001                  |
| plovers (8)                               | < 0.001                    | < 0.001                      | > 0.999                | < 0.001                  | > 0.999                   | 0.037                       | 0.960                  | < 0.001                  |
| sandpipers (11)                           | < 0.001                    | 0.013                        | < 0.001                | < 0.001                  | < 0.001                   | 0.001                       | 0.626                  | 0.261                    |
| gulls (7)                                 | < 0.001                    | < 0.001                      | < 0.001                | < 0.001                  | 0.007                     | < 0.001                     | 0.256                  | 0.991                    |
| terns (6)                                 | 0.833                      | 0.210                        | < 0.001                | < 0.001                  | 0.002                     | < 0.001                     | < 0.001                | < 0.001                  |
| pigeons (4)                               | 0.031                      | 0.020                        | 0.022                  | < 0.001                  | < 0.001                   | 0.002                       | < 0.001                | < 0.001                  |
| owls (6)                                  | 0.001                      | < 0.001                      | < 0.001                | < 0.001                  | < 0.001                   | < 0.001                     | < 0.001                | < 0.001                  |
| woodpeckers (5)                           | 0.079                      | 0.926                        | 0.761                  | > 0.999                  | 0.104                     | 0.327                       | 0.001                  | 0.001                    |
| aerial insectivores (4)                   | 0.109                      | 0.214                        | 0.976                  | < 0.001                  | > 0.999                   | < 0.001                     | > 0.999                | < 0.001                  |
| openland insectivores (9)                 | 0.009                      | 0.780                        | 0.021                  | < 0.001                  | 0.033                     | < 0.001                     | < 0.001                | < 0.001                  |
| terrestrial & low strata flycatchers (10) | < 0.001                    | < 0.001                      | 0.306                  | < 0.001                  | < 0.001                   | < 0.001                     | < 0.001                | < 0.001                  |
| thrushes(5)                               | 0.002                      | 0.191                        | 0.089                  | < 0.001                  | < 0.001                   | < 0.001                     | < 0.001                | < 0.001                  |
| marsh warblers (7)                        | 0.755                      | 0.941                        | 0.953                  | < 0.001                  | < 0.001                   | < 0.001                     | < 0.001                | < 0.001                  |
| foliage gleaners (12)                     | < 0.001                    | 0.627                        | > 0.999                | 0.024                    | < 0.001                   | 0.975                       | 0.967                  | 0.918                    |
| tit-like birds (12)                       | < 0.001                    | < 0.001                      | > 0.999                | < 0.001                  | 0.569                     | < 0.001                     | 0.783                  | < 0.001                  |
| corvids (7)                               | < 0.001                    | 0.642                        | 0.740                  | < 0.001                  | 0.001                     | < 0.001                     | 0.001                  | < 0.001                  |
| passerine seedeaters (7)                  | < 0.001                    | 0.887                        | > 0.999                | < 0.001                  | 0.259                     | < 0.001                     | < 0.001                | < 0.001                  |
| SEGREGATED                                | 17                         | 12                           | 11                     | 22                       | 16                        | 20                          | 16                     | 20                       |
| RANDOM                                    | 7                          | 12                           | 5                      | 0                        | 4                         | 2                           | 3                      | 2                        |
| AGGREGATED                                | 0                          | 0                            | 8                      | 2                        | 4                         | 2                           | 5                      | 2                        |
