# Supplementary material
Source: PubMed Central journal article supplement (PMC2841898)
Supplement: 0914089107_st05.pdf [file 0914089107_st05.pdf]

**Table S5. Co-occurrence analyses of congeneric guilds.**

Entries as in Table S4.

| Ecological Guild        | Fixed-Fixed Model<br>5 × 5 | Fixed-Fixed Model<br>10 × 10 | Habitat Model<br>5 × 5 | Habitat Model<br>10 × 10 | Population Model<br>5 × 5 | Population Model<br>10 × 10 | Biomass Model<br>5 × 5 | Biomass Model<br>10 × 10 |
|-------------------------|----------------------------|------------------------------|------------------------|--------------------------|---------------------------|-----------------------------|------------------------|--------------------------|
| <i>Anthus</i> (4)       | 0.326                      | 0.995                        | < 0.001                | < 0.001                  | 0.001                     | < 0.001                     | 0.001                  | < 0.001                  |
| <i>Acrocephalus</i> (4) | 0.578                      | 0.142                        | < 0.001                | < 0.001                  | < 0.001                   | < 0.001                     | < 0.001                | < 0.001                  |
| <i>Sylvia</i> (5)       | 0.017                      | 0.020                        | 0.605                  | 0.430                    | 0.981                     | 0.942                       | 0.951                  | 0.808                    |
| <i>Phylloscopus</i> (4) | 0.189                      | 0.712                        | > 0.999                | <i>‡</i> <0.001          | 0.779                     | 0.213                       | 0.976                  | 0.283                    |
| <i>Parus</i> (6)        | < 0.001                    | < 0.001                      | > 0.999                | < 0.001                  | 0.569                     | < 0.001                     | 0.783                  | < 0.001                  |
| <i>Corvus</i> (4)       | < 0.001                    | < 0.001                      | < 0.001                | <i>‡</i> <0.001          | < 0.001                   | < 0.001                     | < 0.001                | < 0.001                  |
| <i>Carduelis</i> (5)    | < 0.001                    | 0.245                        | 0.164                  | <i>‡</i> <0.001          | < 0.001                   | < 0.001                     | < 0.001                | < 0.001                  |
| <i>Turdus</i> (5)       | 0.002                      | 0.191                        | 0.089                  | < 0.001                  | < 0.001                   | < 0.001                     | < 0.001                | < 0.001                  |
| SEGREGATED              | 5                          | 3                            | 3                      | 7                        | 5                         | 6                           | 5                      | 6                        |
| RANDOM                  | 3                          | 4                            | 3                      | 1                        | 2                         | 2                           | 1                      | 2                        |
| AGGREGATED              | 0                          | 1                            | 2                      | 0                        | 1                         | 0                           | 2                      | 0                        |

*‡*Entries in italics indicate three models for which it was not possible to generate 1000 randomizations because the constraints were very difficult to achieve, and the simulation usually aborted after thousands of unsuccessful trials. These p-values were estimated from the standardized effect size, based on 10 successful replications of each model.
