# Supplementary material
Source: PubMed Central journal article supplement (PMC2841898)
Supplement: 0914089107_st06.pdf [file 0914089107_st06.pdf]

**Table S6. Habitat utilization and electivity in foraging guilds.**

Cell entries represent the average pairwise values of niche overlap for species in ecological guilds (number of species in parentheses). The left-hand column presents habitat utilization overlap values whereas the right-hand column represents electivity overlap values, which are scaled to account for the areas of different habitats in Denmark. Yellow shading indicates statistically significant overlap in habitat utilization or electivity ( $p < 0.01$  for most analyses). Unshaded entries indicate a pattern that was not statistically significant. None of the foraging guilds exhibited significant segregation in habitat utilization or electivity.

| Ecological Guild       | Grain size | Utilization Overlap | Electivity Overlap |
|------------------------|------------|---------------------|--------------------|
| aquatic pursuers (8)   | 5 × 5      | 0.852               | 0.800              |
|                        | 10 × 10    | 0.887               | 0.776              |
| wading birds (6)       | 5 × 5      | 0.860               | 0.585              |
|                        | 10 × 10    | 0.797               | 0.615              |
| grazing waterfowl (5)  | 5 × 5      | 0.882               | 0.873              |
|                        | 10 × 10    | 0.852               | 0.911              |
| dabbling ducks (7)     | 5 × 5      | 0.937               | 0.903              |
|                        | 10 × 10    | 0.938               | 0.905              |
| diving ducks (4)       | 5 × 5      | 0.768               | 0.618              |
|                        | 10 × 10    | 0.793               | 0.797              |
| diurnal raptors (12)   | 5 × 5      | 0.913               | 0.764              |
|                        | 10 × 10    | 0.942               | 0.866              |
| gallinaceous birds (4) | 5 × 5      | 0.936               | 0.835              |
|                        | 10 × 10    | 0.905               | 0.834              |
| rails (5)              | 5 × 5      | 0.980               | 0.831              |
|                        | 10 × 10    | 0.99                | 0.889              |
| plovers (8)            | 5 × 5      | 0.725               | 0.725              |
|                        | 10 × 10    | 0.667               | 0.658              |

|                                           |         |       |       |
|-------------------------------------------|---------|-------|-------|
| sandpipers ( 11)                          | 5 × 5   | 0.897 | 0.704 |
|                                           | 10 × 10 | 0.857 | 0.729 |
| gulls (7)                                 | 5 × 5   | 0.843 | 0.730 |
|                                           | 10 × 10 | 0.900 | 0.755 |
| terns (6)                                 | 5 × 5   | 0.806 | 0.694 |
|                                           | 10 × 10 | 0.820 | 0.810 |
| pigeons (4)                               | 5 × 5   | 0.978 | 0.862 |
|                                           | 10 × 10 | 0.927 | 0.883 |
| owls (6)                                  | 5 × 5   | 0.936 | 0.836 |
|                                           | 10 × 10 | 0.916 | 0.864 |
| woodpeckers (5)                           | 5 × 5   | 0.970 | 0.863 |
|                                           | 10 × 10 | 0.978 | 0.902 |
| aerial insectivores (4)                   | 5 × 5   | 0.997 | 0.984 |
|                                           | 10 × 10 | 0.986 | 0.987 |
| openland insectivores (9)                 | 5 × 5   | 0.786 | 0.785 |
|                                           | 10 × 10 | 0.866 | 0.820 |
| terrestrial & low strata flycatchers (10) | 5 × 5   | 0.890 | 0.853 |
|                                           | 10 × 10 | 0.931 | 0.874 |
| thrushes(5)                               | 5 × 5   | 0.978 | 0.880 |
|                                           | 10 × 10 | 0.925 | 0.926 |
| marsh warblers (7)                        | 5 × 5   | 0.965 | 0.850 |
|                                           | 10 × 10 | 0.954 | 0.902 |
| foliage gleaners (12)                     | 5 × 5   | 0.884 | 0.870 |
|                                           | 10 × 10 | 0.907 | 0.841 |
| tit-like birds (12)                       | 5 × 5   | 0.984 | 0.934 |
|                                           | 10 × 10 | 0.974 | 0.937 |
| corvids (7)                               | 5 × 5   | 0.988 | 0.954 |
|                                           | 10 × 10 | 0.984 | 0.960 |
| passerine seedeaters (7)                  | 5 × 5   | 0.944 | 0.931 |
|                                           | 10 × 10 | 0.980 | 0.958 |
