# Supplementary material
Source: PubMed Central journal article supplement (PMC2841898)
Supplement: 0914089107_st07.pdf [file 0914089107_st07.pdf]

**Table S7. Habitat utilization and electivity in congeneric guilds.**

Each row represents a different guild. Entries as in Table S6 except that tan shading indicates significantly lower niche overlap than expected by chance.

| Congeneric Guild        | Grain size | Utilization Overlap | Electivity Overlap |
|-------------------------|------------|---------------------|--------------------|
| <i>Anthus</i> (4)       | 5 × 5      | 0.657               | 0.711              |
|                         | 10 × 10    | 0.772               | 0.724              |
| <i>Acrocephalus</i> (4) | 5 × 5      | 0.973               | 0.902              |
|                         | 10 × 10    | 0.982               | 0.951              |
| <i>Sylvia</i> (5)       | 5 × 5      | 0.911               | 0.836              |
|                         | 10 × 10    | 0.893               | 0.810              |
| <i>Phylloscopus</i> (7) | 5 × 5      | 0.743               | 0.811              |
|                         | 10 × 10    | 0.830               | 0.825              |
| <i>Parus</i> (6)        | 5 × 5      | 0.986               | 0.939              |
|                         | 10 × 10    | 0.968               | 0.933              |
| <i>Corvus</i> (4)       | 5 × 5      | 0.994               | 0.966              |
|                         | 10 × 10    | 0.976               | 0.976              |
| <i>Carduelis</i> (5)    | 5 × 5      | 0.992               | 0.968              |
|                         | 10 × 10    | 0.990               | 0.984              |
| <i>Turdus</i> (5)       | 5 × 5      | 0.978               | 0.880              |
|                         | 10 × 10    | 0.925               | 0.926              |
